# Supplementary material
Source: MDPI journal article supplement (https://www.mdpi.com/2073-4395/7/3/61)
Supplement: s1 [file s1]

## Supplementary Material

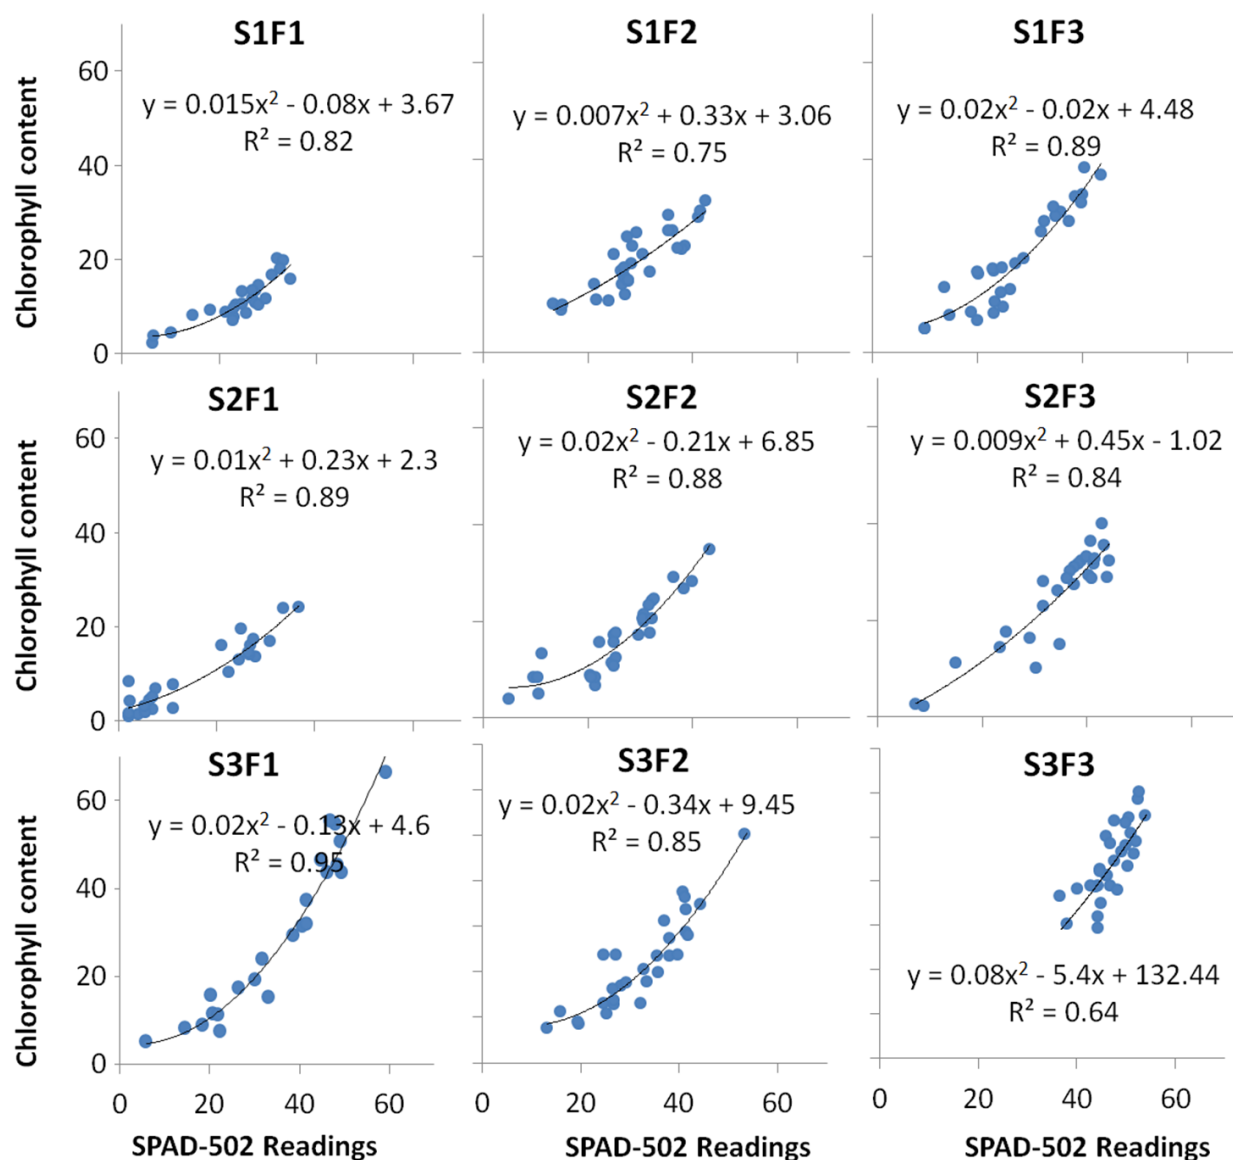

**Figure S1.** Relationships between leaf SPAD-502 readings and the chlorophyll contents in wheat grown at various levels of salinity and fertilizer application. Second order polynomial curve was fitted to the data ( $n=30$  in each case). Each curve represents data obtained from a combination of salinity (S) and fertilizer (F) treatment. S1, S2 and S3 denote no-salinity,  $7.0 \text{ dSm}^{-1}$  and  $14 \text{ dSm}^{-1}$  salinity level, respectively. F1, F2 and F3 shows no-fertilizer, full dose and double dose of the recommendation for wheat crop.

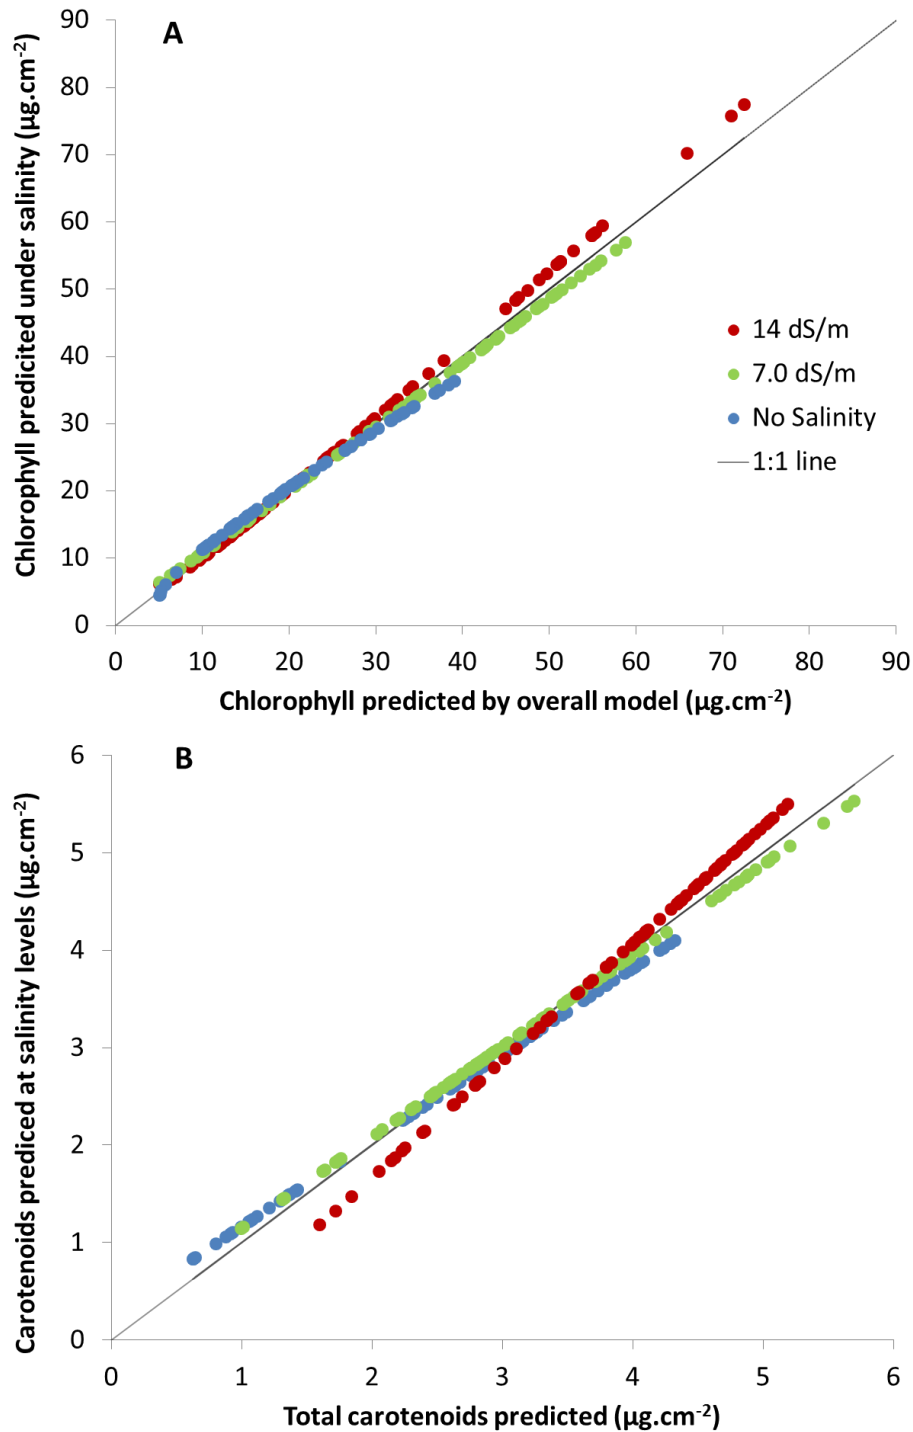

**Figure S2.** Plot of values obtained from generalized and salinity specific regression models showing the relationship between *Chlt* predicted. Markers with different colors show values predicted using regression model developed for different salinity levels.

**Table S1.** Increase/decrease of the pigments contents (%) by various treatment combinations relative to the control basal treatment.

| Treatments<br>Variables   |      | S1    |       | S2    |       | S3    |       | F1    |        | F2    |       | F3    |        |
|---------------------------|------|-------|-------|-------|-------|-------|-------|-------|--------|-------|-------|-------|--------|
|                           |      | F2-F1 | F3-F1 | F2-F1 | F3-F1 | F2-F1 | F3-F1 | S2-S1 | S3-S1  | S2-S1 | S3-S1 | S2-S1 | S3-S1  |
|                           | SPAD | 16.2  | 33.7  | 25.3  | 37.3  | 32.4  | 47.1  | 56.2  | 100.0  | 12.8  | 35.3  | 10.7  | 39.8   |
| Contents per<br>leaf area | Chla | 66.7  | 144.9 | 75.0  | 226.3 | 31.8  | 103.2 | 10.1  | 127.5  | 15.7  | 80.0  | 46.7  | 88.8   |
|                           | Chlb | 64.5  | 122.6 | 24.4  | 137.8 | 37.7  | 98.4  | 45.2  | 96.8   | 9.8   | 64.7  | 55.1  | 75.4   |
|                           | Ct   | 58.8  | 100.0 | 54.5  | 77.3  | 12.5  | 53.1  | 29.4  | 88.2   | 25.9  | 33.3  | 14.7  | 44.1   |
|                           | Chlt | 63.0  | 138.0 | 59.3  | 200.0 | 33.0  | 100.9 | 18.0  | 118.0  | 15.3  | 77.9  | 48.7  | 84.0   |
| Amount per<br>plant       | Chla | 126.0 | 284.5 | 129.4 | 359.4 | 94.4  | 353.5 | -31.7 | -33.6  | -29.7 | -13.3 | -10.2 | -55.4  |
|                           | Chlb | 68.7  | 164.2 | 63.1  | 234.7 | 103.0 | 342.7 | -32.1 | -104.4 | -36.6 | -22.0 | -4.3  | -69.8  |
|                           | Ct   | 115.4 | 214.0 | 102.6 | 149.6 | 65.8  | 213.9 | -12.1 | -61.5  | -19.1 | -61.6 | -41.0 | -109.8 |
|                           | Chlt | 121.1 | 273.6 | 108.8 | 322.3 | 96.1  | 348.4 | -22.9 | -39.5  | -30.1 | -16.2 | -8.7  | -57.2  |

F1= no-fertilizer application (fertilizer control), F2= full recommended dose fertilizer, F3 = double of recommended the recommended dose, S1 = zero-salinity treatment, S2 = 7.0 dSm-1 salinity level, S3 = 14 dSm-1 salinity level, Chla = Chlorophyll 'a' content, Chlb = Chlorophyll 'b' content, Chlt = total chlorophyll content, Ct = carotenoid content
